# Supplementary material for: Sequential partial ion exchange synthesis of composite Ni3S2/Co9S8/NiSe nanoarrays with a lavender-like hierarchical morphology
Source: Royal Society of Chemistry journal article supplement (doi:10.1039/c7qi00047b), 2017-01-01
Supplement: c7qi00047b1.pdf [file c7qi00047b1.pdf]

## Supporting Information

### **Sequential Partial Ion Exchange Synthesis of Composite $\text{Ni}_3\text{S}_2/\text{Co}_9\text{S}_8/\text{NiSe}$ Nanoarrays with Lavender-like Hierarchical Morphology**

Shaobo Huang,<sup>a</sup> Wangxi Zhang,<sup>a</sup> Shizhong Cui,<sup>a</sup> Weihua Chen<sup>b,\*</sup> and Liwei Mi<sup>a,\*</sup>

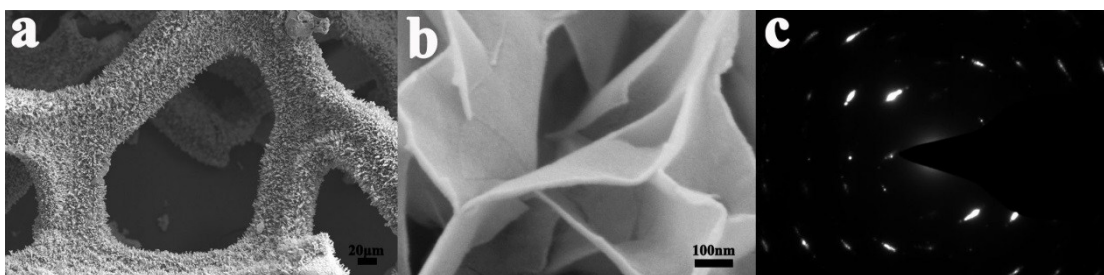

**Figure S1.** (a) Low-magnification skeleton of Ni@Ni<sub>3</sub>S<sub>2</sub> (b) the high magnification of nanoflakes (c) SAED images of Ni@Ni<sub>3</sub>S<sub>2</sub>

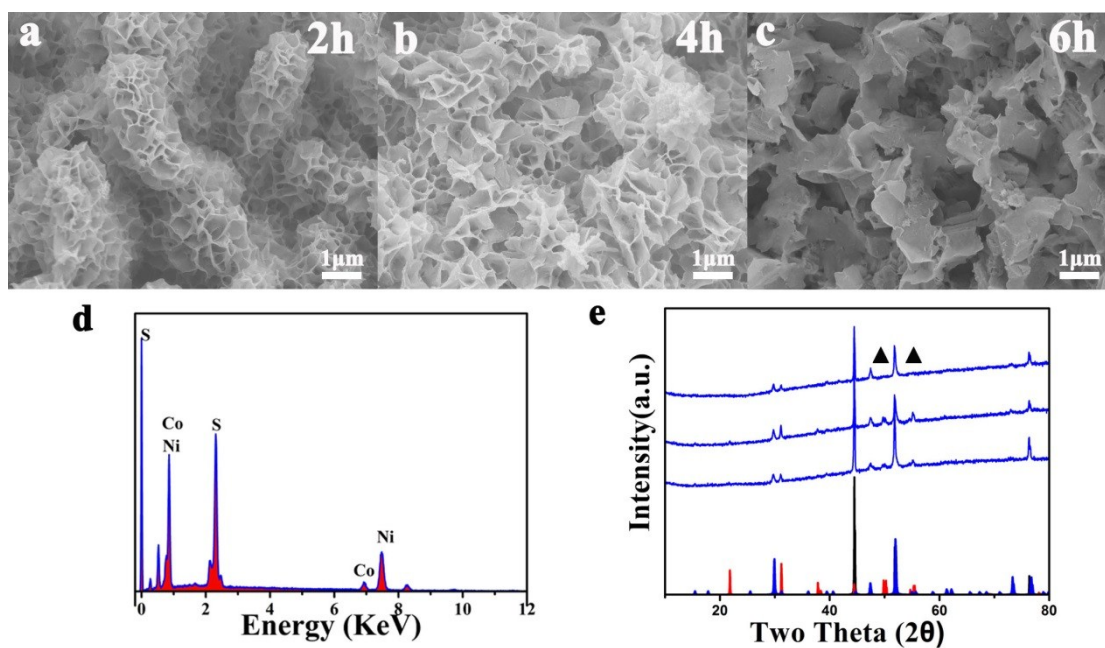

**Figure S2.** SEM images of Co-exchange progress at different reaction time from (a-c). (d) EDS results at the Co exchange reaction time of 2h. (e) XRD results at different reaction time.

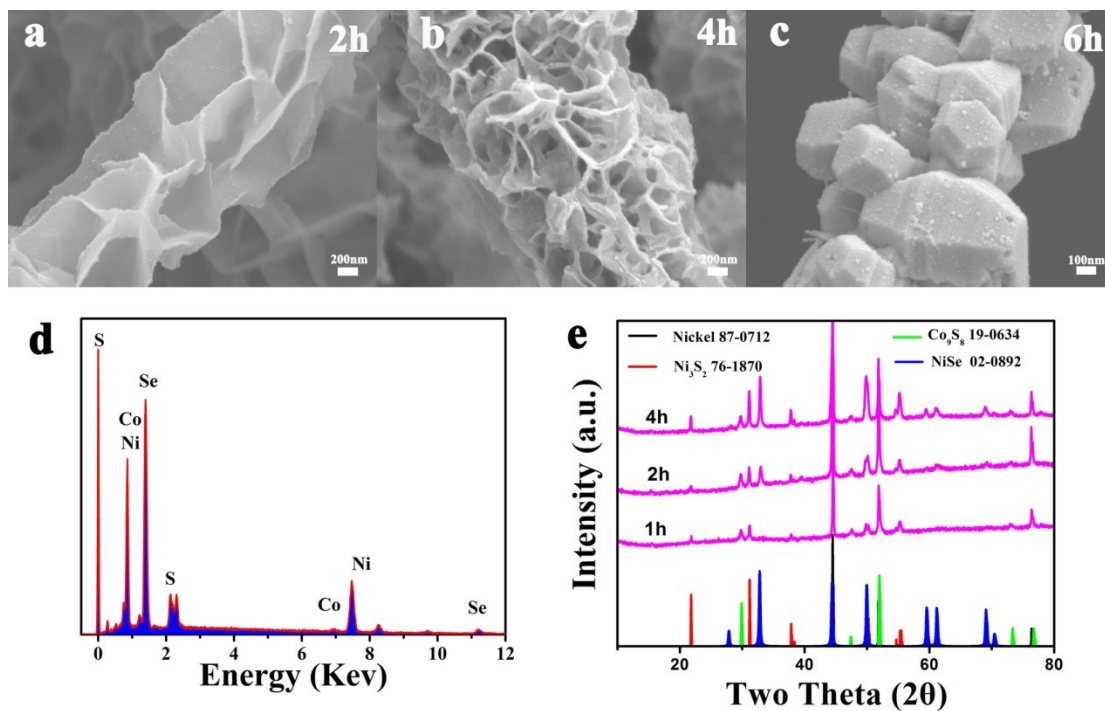

**Figure S3.** SEM images of Se-exchange progress at different reaction time from (a-c). (d) EDS results at the Se exchange reaction time of 2h. (e) XRD results at different Se exchange reaction time.

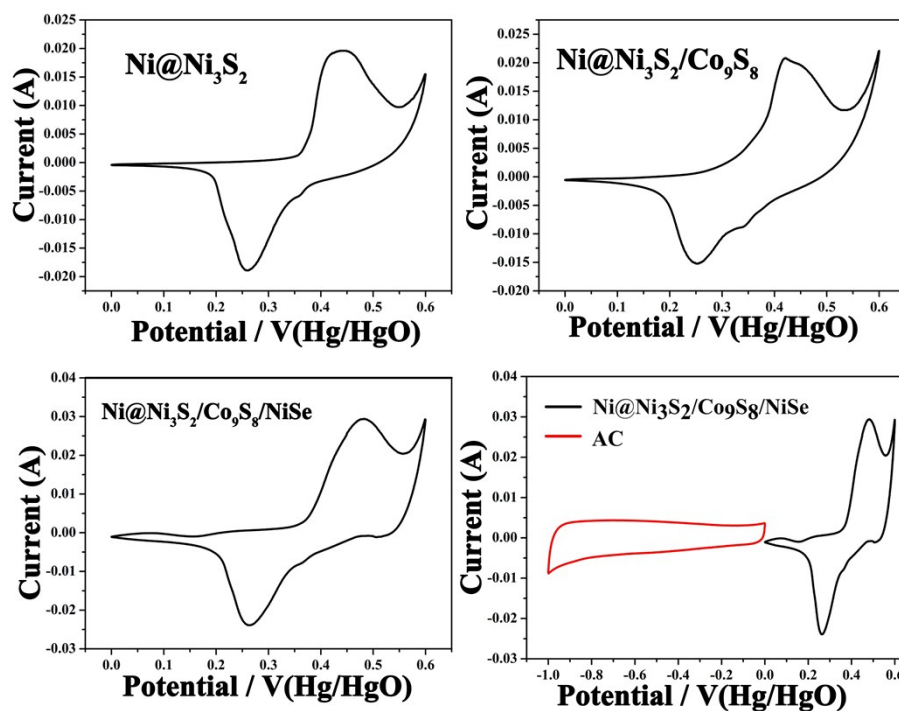

**Figure S4.** CV curves of (a) Ni@Ni<sub>3</sub>S<sub>2</sub>, (b) Ni@Ni<sub>3</sub>S<sub>2</sub>/Co<sub>9</sub>S<sub>8</sub>, (c) Ni@Ni<sub>3</sub>S<sub>2</sub>/Co<sub>9</sub>S<sub>8</sub>/NiSe at scan rates of 5 mV s<sup>-1</sup> in a three-electrode (d) CV curves of Ni@Ni<sub>3</sub>S<sub>2</sub>/Co<sub>9</sub>S<sub>8</sub>/NiSe and AC electrodes measured at a scan rate of 5 mV s<sup>-1</sup> in a three-electrode system

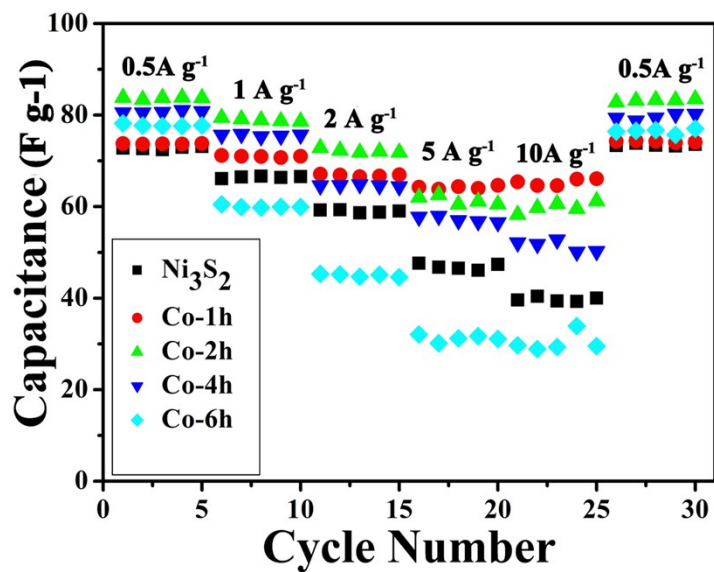

Figure S5. Rate performance of under different reaction time during Co exchange progress at the different current density.

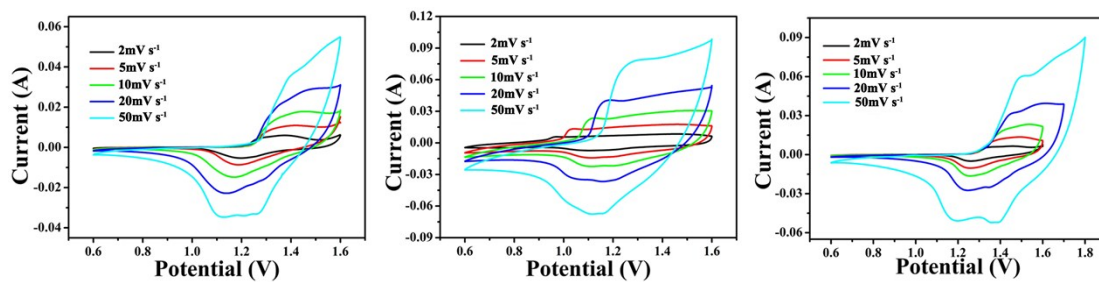

Figure S6. (a) CV curve of Ni@Ni<sub>3</sub>S<sub>2</sub> at different scan speed. (b) CV curve of Ni@Ni<sub>3</sub>S<sub>2</sub>/Co<sub>9</sub>S<sub>8</sub> at different scan speed

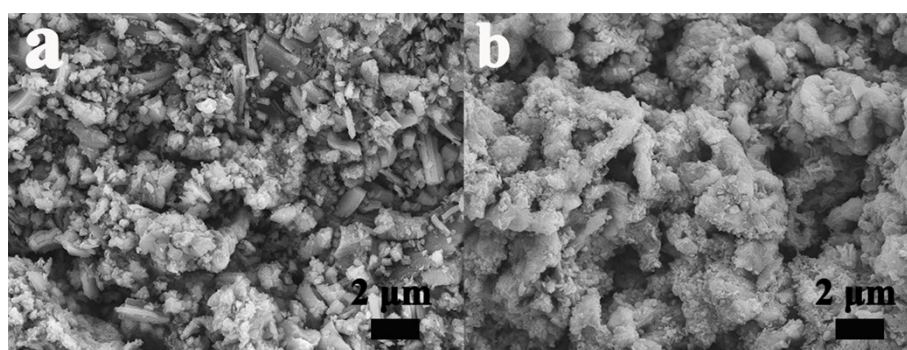

Figure S7. SEM images after 2000th cycles (a) SEM image of Ni@Ni<sub>3</sub>S<sub>2</sub> (b) SEM images of Ni@Ni<sub>3</sub>S<sub>2</sub>/Co<sub>9</sub>S<sub>8</sub>/NiSe

Table S1: Comparison of related materials about the power density at maximum energy density

| <b>Devices</b>                                                              | <b>Energy density</b>           | <b>Power density</b>            | <b>Source</b>                                                   |
|-----------------------------------------------------------------------------|---------------------------------|---------------------------------|-----------------------------------------------------------------|
| Ni <sub>3</sub> S <sub>2</sub> //AC                                         | 17.5 Wh kg <sup>-1</sup>        | 301 W kg <sup>-1</sup>          | <i>Journal of Power Sources</i> , 2016, <b>320</b> , 13-19.     |
| Ni <sub>3</sub> S <sub>2</sub> @CoS//AC                                     | 28.24 Wh kg <sup>-1</sup>       | 134.46 W kg <sup>-1</sup>       | <i>Phys. Chem. Chem. Phys.</i> , 2015, <b>17</b> , 16434-16442. |
| AB-NiCo <sub>2</sub> S <sub>4</sub> //AC                                    | 24.7 Wh kg <sup>-1</sup>        | 428 W kg <sup>-1</sup>          | <i>Electrochimica Acta</i> , 2015, <b>186</b> , 562-571.        |
| NiCo <sub>2</sub> O <sub>4</sub> //AC                                       | 22.8                            | 160                             | <i>J. Mater. Chem. A</i> , 2015, <b>3</b> , 12452-12460.        |
| NiCo <sub>2</sub> O <sub>4</sub> @Ni <sub>3</sub> S <sub>2</sub> //AC       | 1.89 mW h cm <sup>-3</sup>      | 5.81 W cm <sup>-3</sup>         | <i>Nanoscale</i> , 2016, <b>8</b> , 10686-10694.                |
| Co <sub>3</sub> S <sub>4</sub> /NiS//AC                                     | 4.18 Wh m <sup>-2</sup>         | 160 W m <sup>-2</sup>           | <i>RSC Adv.</i> , 2016, <b>6</b> , 97482-97490.                 |
| Ni(HCO <sub>3</sub> ) <sub>2</sub> //FexCy/C                                | 24.96 Wh kg <sup>-1</sup>       | 87.75 W kg <sup>-1</sup>        | <i>Electrochimica Acta</i> , 2015, <b>180</b> , 330–338.        |
| <b>Ni@Ni<sub>3</sub>S<sub>2</sub>/Co<sub>9</sub>S<sub>8</sub>/NiSe //AC</b> | <b>31.99 Wh kg<sup>-1</sup></b> | <b>105.10 W kg<sup>-1</sup></b> | <b>This work</b>                                                |
